# Supplementary material for: Early Cenozoic Decoupling of Climate and Carbonate Compensation Depth Trends
Source: PubMed Central journal article supplement (PMC6774345; doi:10.1029/2019pa003601), 2019-06-17
Supplement: PALO-34-930-s002.pdf [file PALO-34-930-s002.pdf]

# Code availability statement the cGENIE.muffin model

Andy Ridgwell

March 1, 2019

## **muffin overview**

The code for the cGENIE.muffin model is hosted on GitHub. The current version can be obtained by cloning:

<https://github.com/derpycode/cgenie.muffin>

A manual, detailing code installation, basic model configuration, plus an extensive series of tutorials covering various aspects of muffin capability, experimental design, and results output and processing, is provided. A PDF of the manual can be downloaded here:

<http://www.seao2.info/cgenie/docs/muffin.pdf>

The latex source and most up-to-date built PDF file can be obtained by cloning:

<https://github.com/derpycode/muffindoc>

## **Instructions summary**

The muffin manual contains instructions for obtaining, installing, and testing the code, plus how to run experiments. Specifically:

**Section 1.1** – provides a basic over-view of the software environment required for installing and running muffin.

**Section 1.2.2** – provides a basic over-view of cloning and testing the code.

**Section 15.4** – provides a detailed guide to cloning the code and configuring a Ubuntu (18.04) software environment including netCDF library installation, plus running a basic test.

**Section 15.6** – provides a detailed guide to cloning the code and configuring a macOS software environment including netCDF library installation, plus running a basic test.

**Section 1.3** – provides a basic guide to running experiments (also see 1.6 and 1.7).

**Section 1.4** – provides a basic introduction to model output (much more detail is given in Section 12).

## **Model experiments**

Configuration files for the specific experiments presented in the paper can be found in the directory:

`cgenie.muffin\genie-userconfigs\MS\greeneetal.2019`

Details of the different experiments, plus the command line needed to run each one, are given in `readme.txt`.
